# Supplementary material for: Manipulating spin polarization of titanium dioxide for efficient photocatalysis
Source: PubMed Central journal article supplement (PMC6972883; doi:10.1038/s41467-020-14333-w), 2020-01-21
Supplement: 41467_2020_14333_MOESM1_ESM.pdf [file 41467_2020_14333_MOESM1_ESM.pdf]

**Supplementary Information (SI)**

**Manipulating Spin Polarization of Titanium Dioxide for  
Efficient Photocatalysis**

Pan et al.

Supplementary Figures

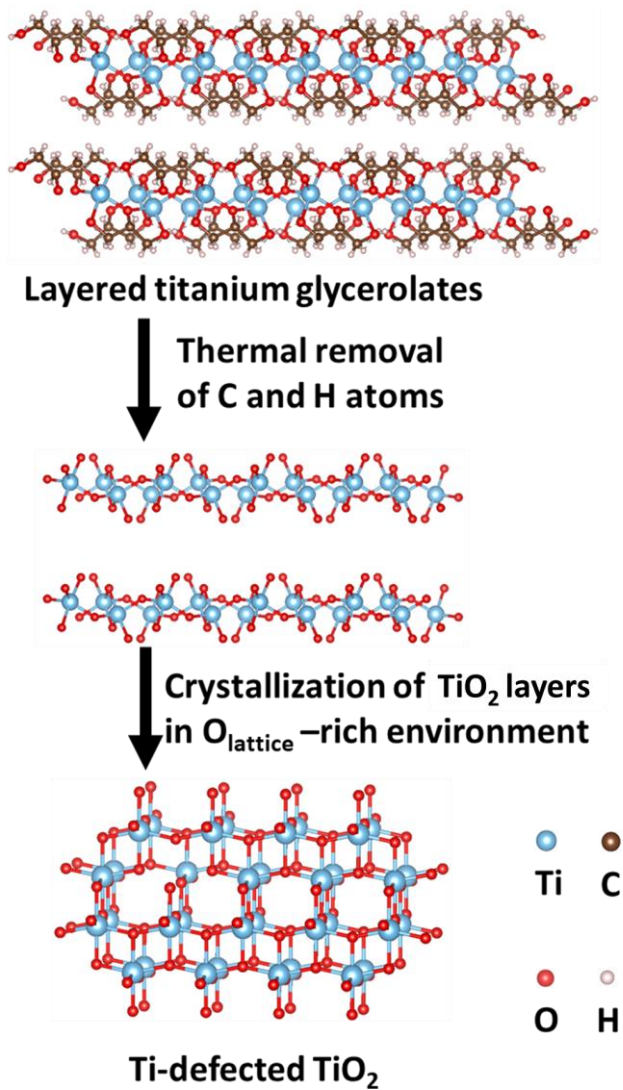

Supplementary Fig. 1 Schematic formation of Ti-defected TiO<sub>2</sub>.

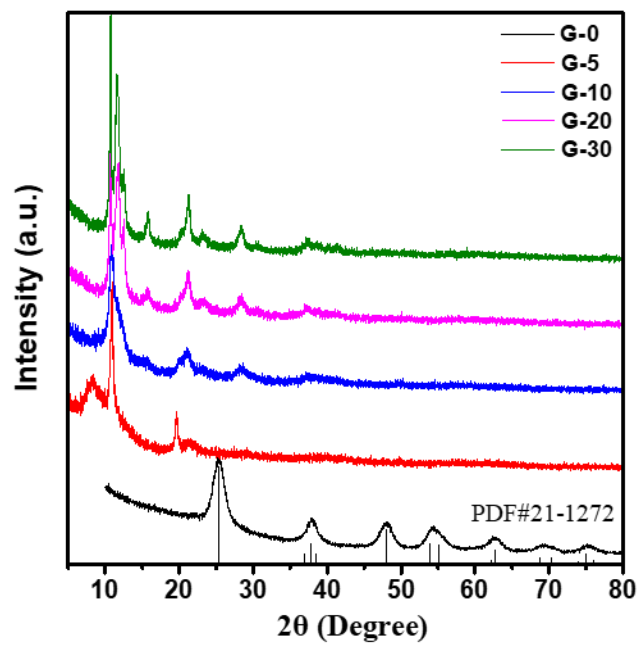

**Supplementary Fig. 2** XRD patterns of G-*m*.

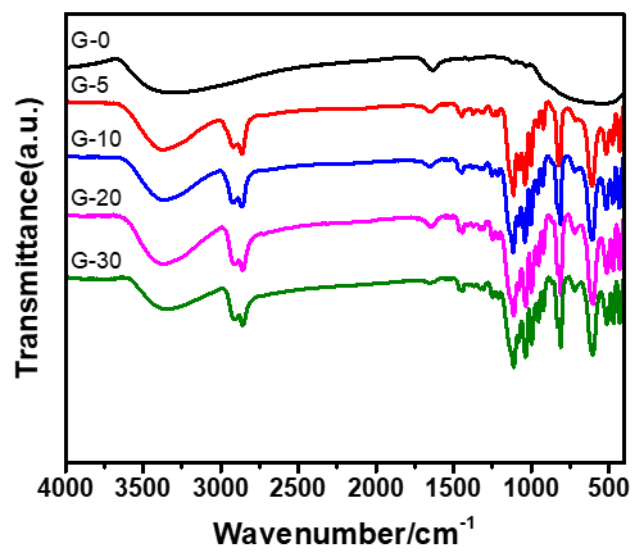

**Supplementary Fig. 3** FT-IR spectra of G-*m*.

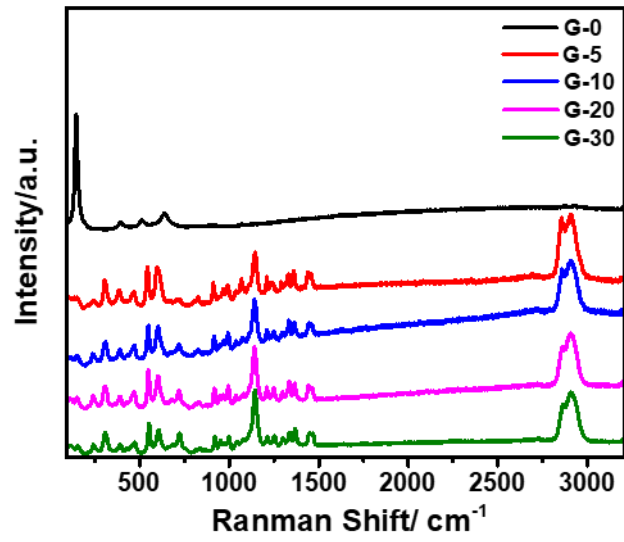

Supplementary Fig. 4 Raman spectra of G- $m$ .

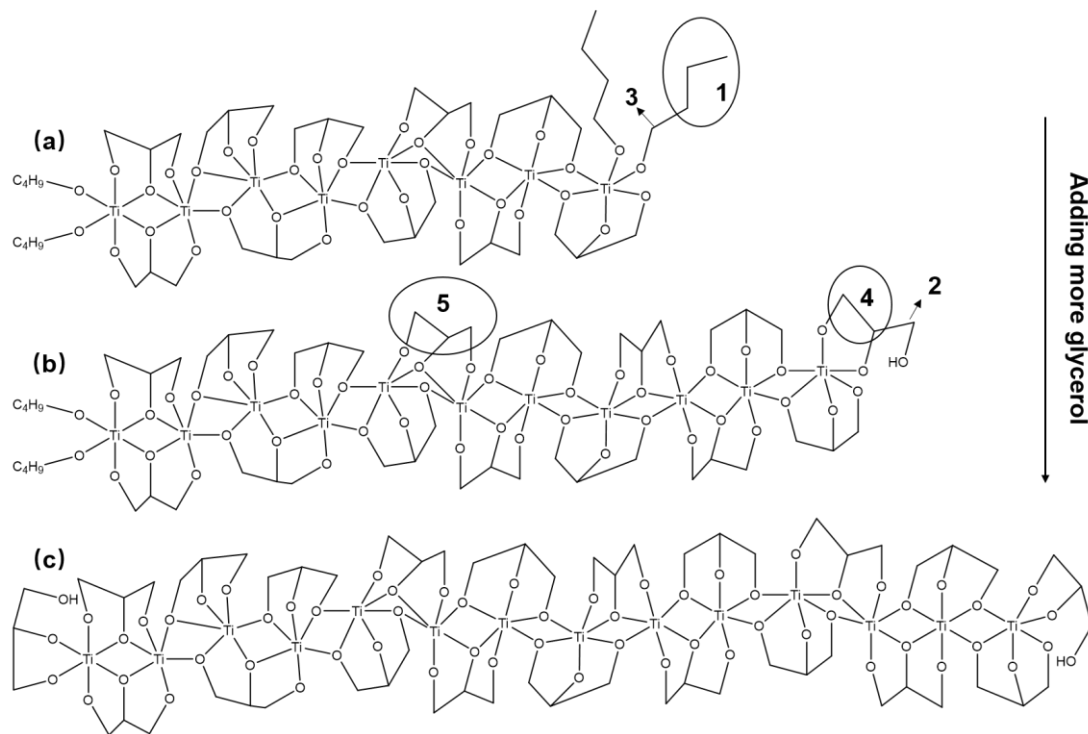

**Supplementary Fig. 5** Structure evolution of glycerolates with increasing amount of glycerol.

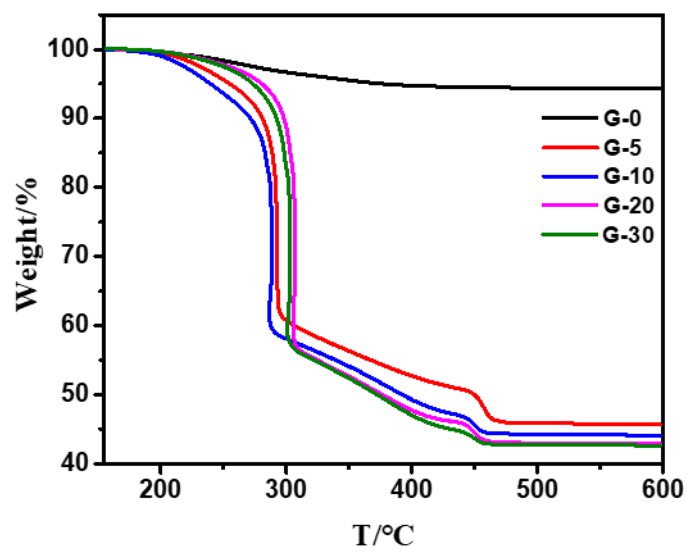

Supplementary Fig. 6 TG curves of G-*m*.

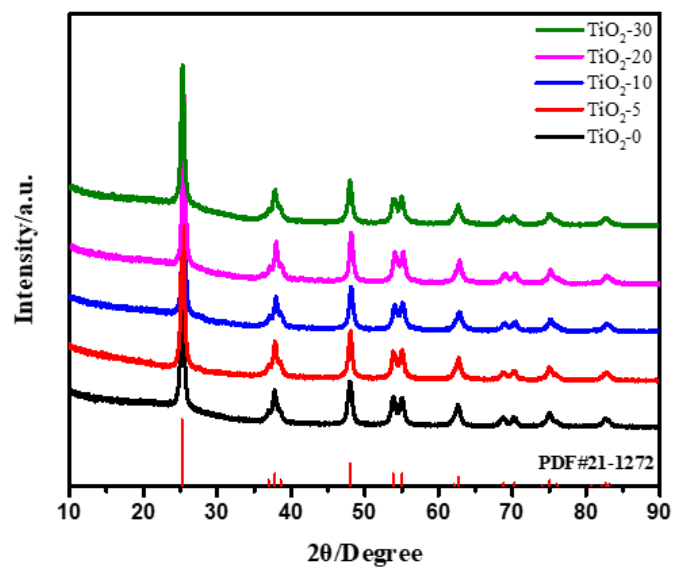

Supplementary Fig. 7 XRD patterns of TiO<sub>2</sub>-*m*.



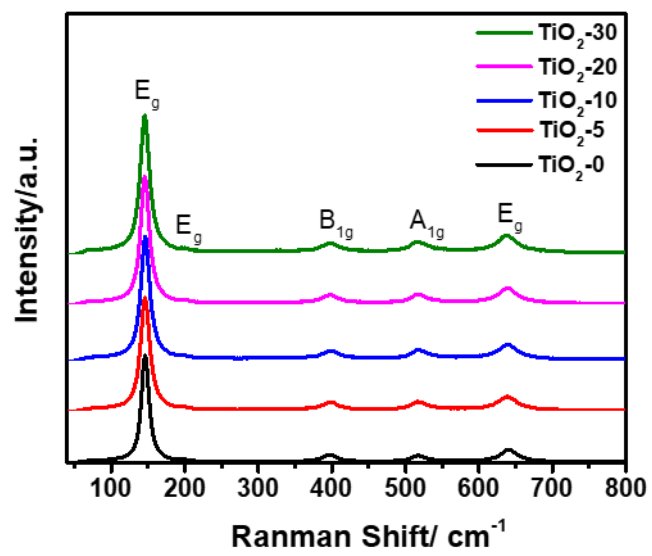

Supplementary Fig. 8 Raman spectra of TiO<sub>2</sub>-*m*.

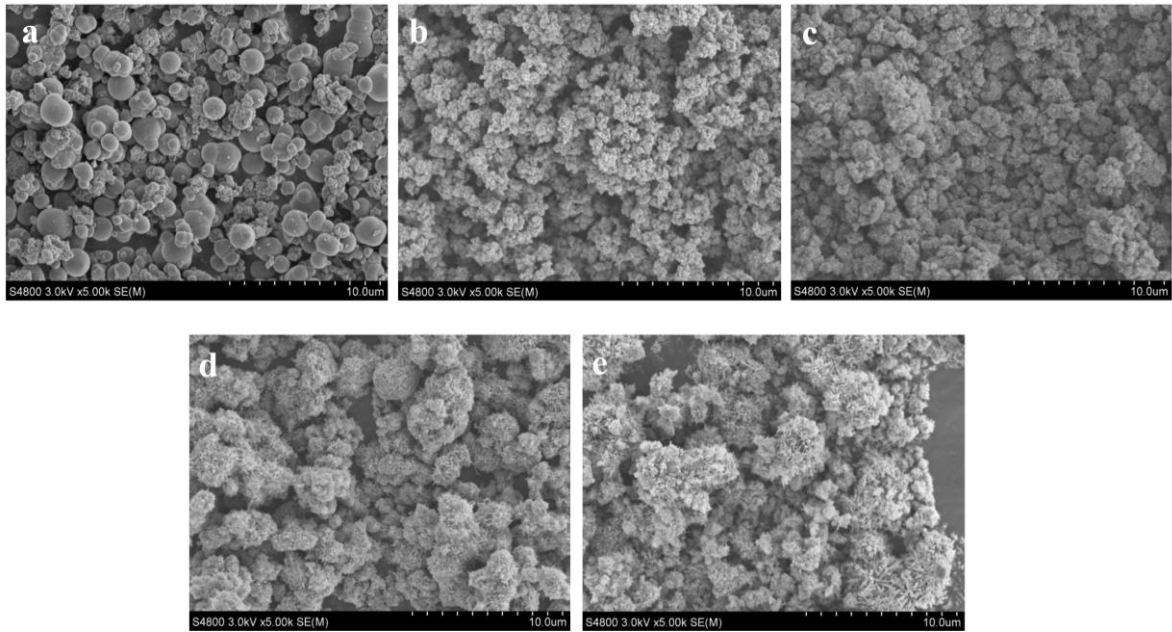

**Supplementary Fig. 9 SEM images of  $\text{TiO}_2\text{-}m$ .** (a)  $\text{TiO}_2\text{-}0$ , (b)  $\text{TiO}_2\text{-}5$ , (c)  $\text{TiO}_2\text{-}10$ , (d)  $\text{TiO}_2\text{-}20$ , and (e)  $\text{TiO}_2\text{-}30$ .

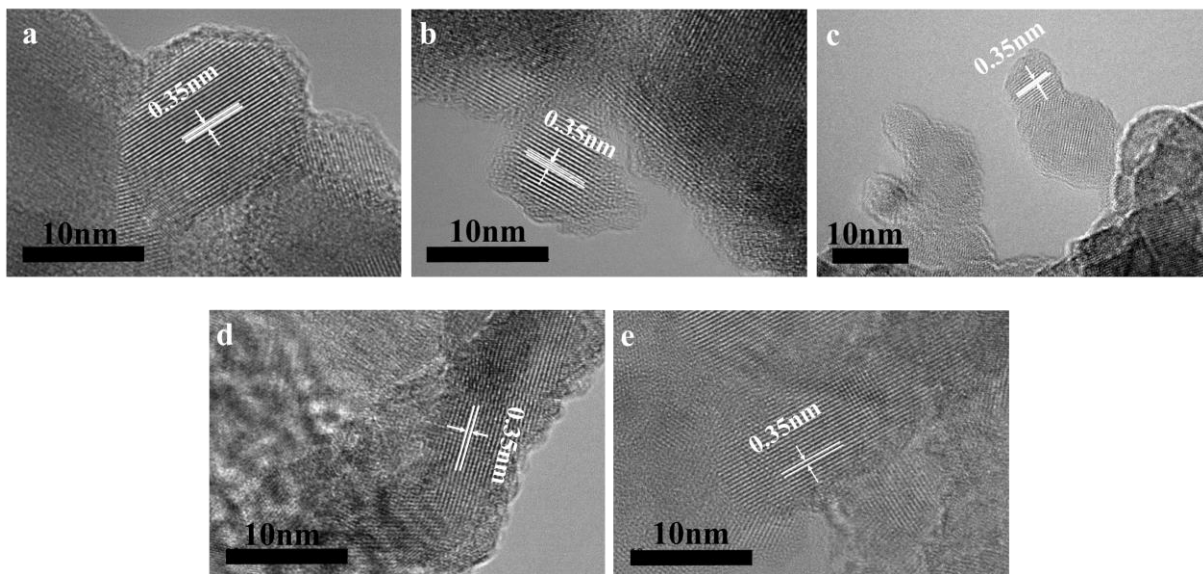

**Supplementary Fig. 10 HR-TEM images of TiO<sub>2</sub>-*m*.** (a) TiO<sub>2</sub>-0, (b) TiO<sub>2</sub>-5, (c) TiO<sub>2</sub>-10, (d) TiO<sub>2</sub>-20, and (e) TiO<sub>2</sub>-30.

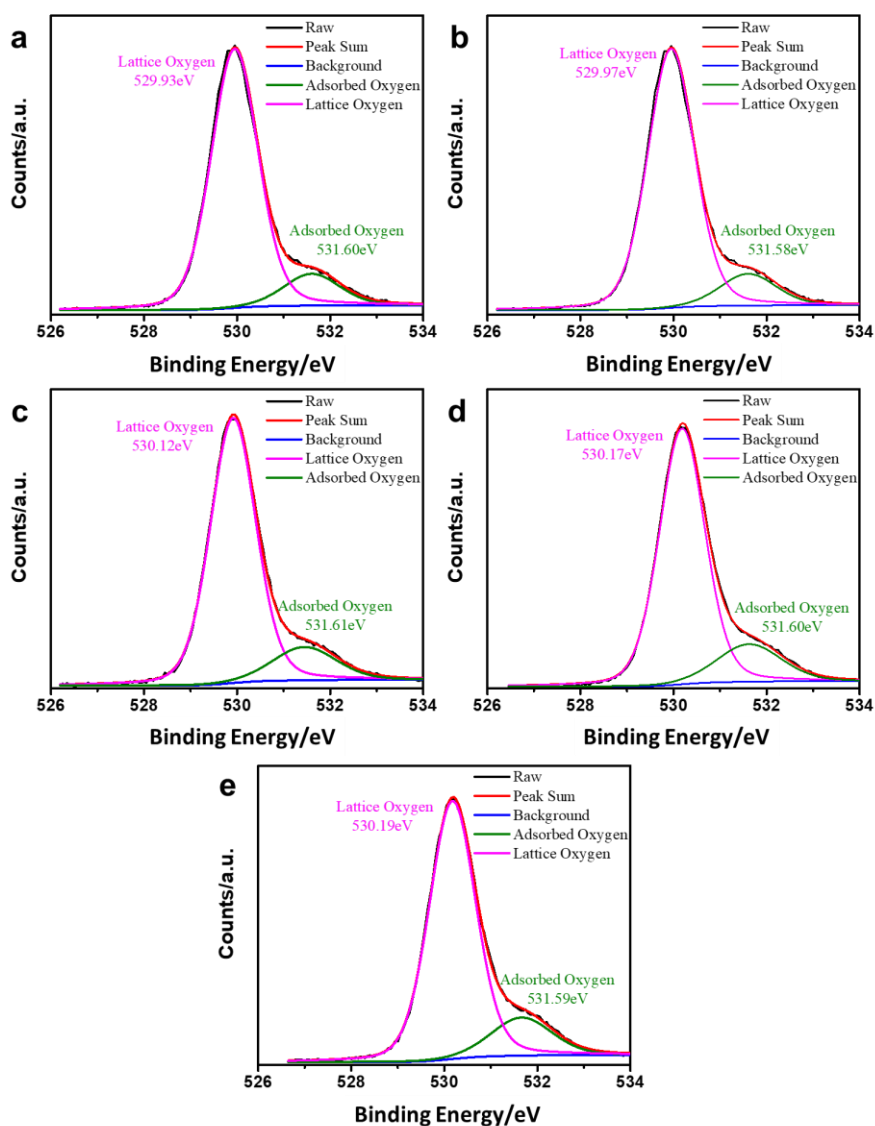

**Supplementary Fig. 11 Fitted O1s XPS signals.** (a) TiO<sub>2</sub>-0, (b) TiO<sub>2</sub>-5, (c) TiO<sub>2</sub>-10, (d) TiO<sub>2</sub>-20, and (e) TiO<sub>2</sub>-30, respectively.

The high resolution XPS spectrum of O1s can be divided into two peaks located at *ca.* 531.6 eV and *ca.* 530.1 eV, which are attributed to the adsorbed oxygen and lattice oxygen, respectively<sup>1,2</sup>.

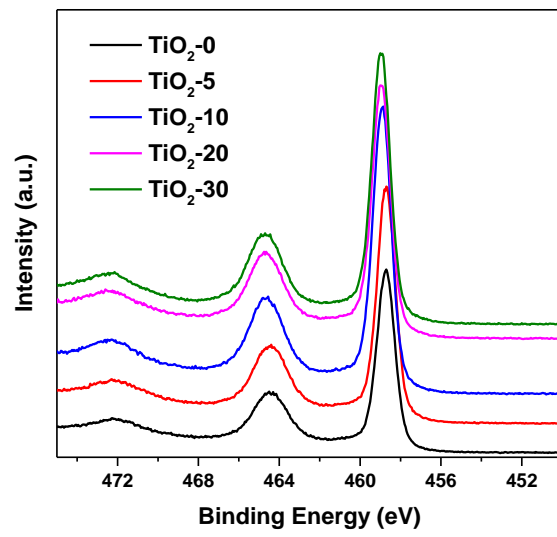

**Supplementary Fig. 12** Ti2p XPS spectra of  $\text{TiO}_2\text{-}m$ .

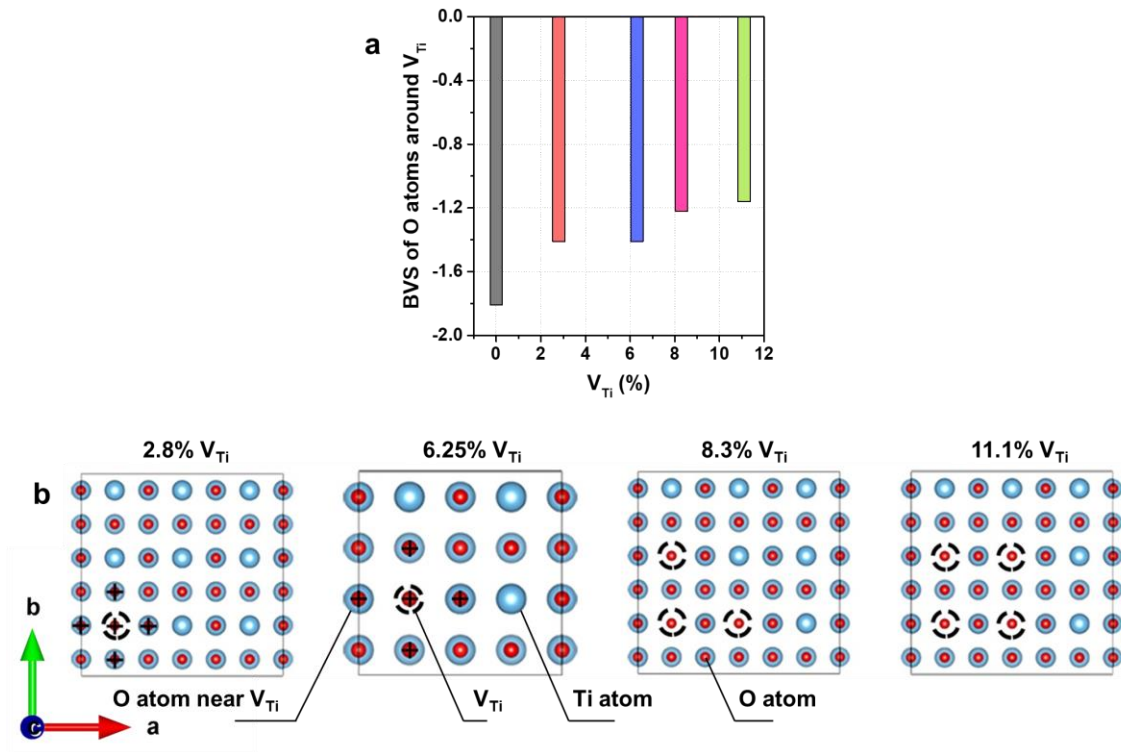

**Supplementary Fig. 13 The bond-valence sum calculation.** The bond-valence sum (BVS) of O atoms around Ti vacancies in  $TiO_2$  (a), and their geometry structures (b).

$$\text{BVS is defined as } \text{BVS} = \sum_i^n \exp\left(\frac{R_0 - R_i}{b}\right), \text{ with } R_0 \text{ as the bond-valence parameter and } b \text{ as } 0.37$$

Å. The  $R_0$  for  $Ti^{4+}$  is 1.815, while  $R_i$  refers to the  $i^{th}$  bond length).

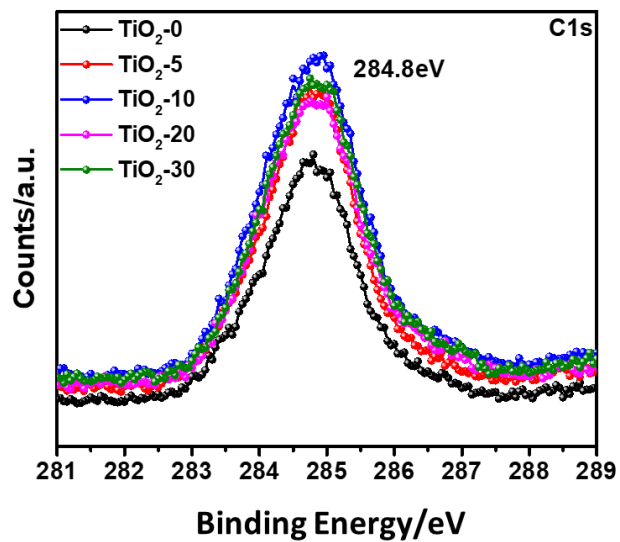

**Supplementary Fig. 14** High-resolution C1s XPS spectra of TiO<sub>2</sub>-*m*. The observed single peak at 284.8 eV is attributed to adventitious carbon.

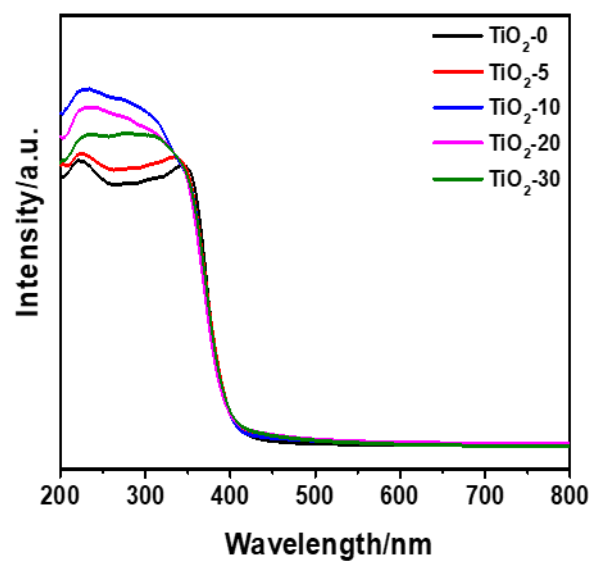

**Supplementary Fig. 15** UV-Vis DRS spectra of TiO<sub>2</sub>-*m*.



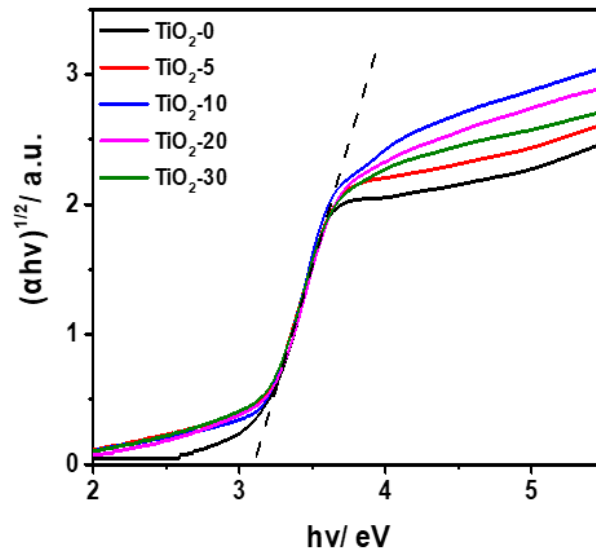

**Supplementary Fig. 16** Plots of transformed Kubelka-Munk function vs. photo energy of  $\text{TiO}_2\text{-}m$ .

The band gap energy was calculated using the following formula:

$$\alpha h\nu = A(h\nu - E_g)^n \quad (1)$$

where  $\alpha$  is the absorption coefficient,  $h$  is Planck's constant,  $E_g$  is the energy band gap,  $\nu$  is the light frequency, and  $n$  corresponds to the characteristics of the transition in semiconductors<sup>3</sup>.

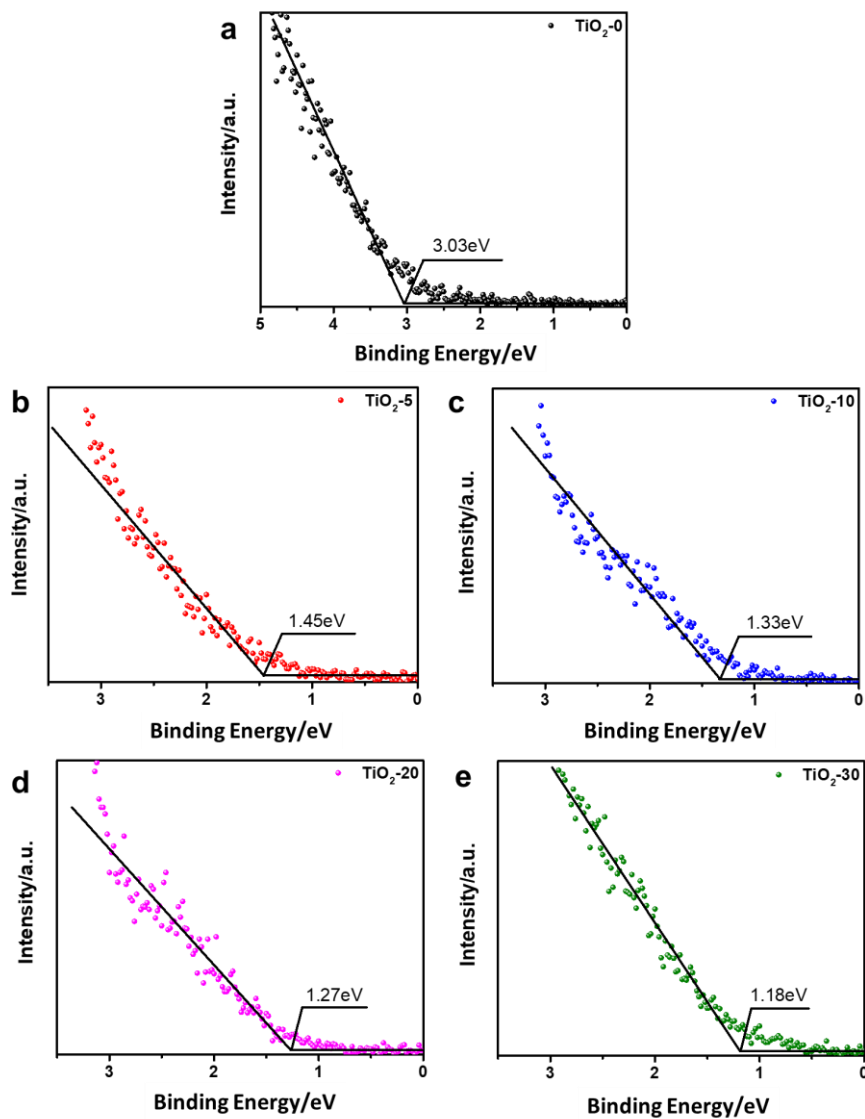

**Supplementary Fig 17 UPS valence-band spectra.** (a)  $\text{TiO}_2$ -0, (b)  $\text{TiO}_2$ -5, (c)  $\text{TiO}_2$ -10, (d)  $\text{TiO}_2$ -20, and (e)  $\text{TiO}_2$ -30.

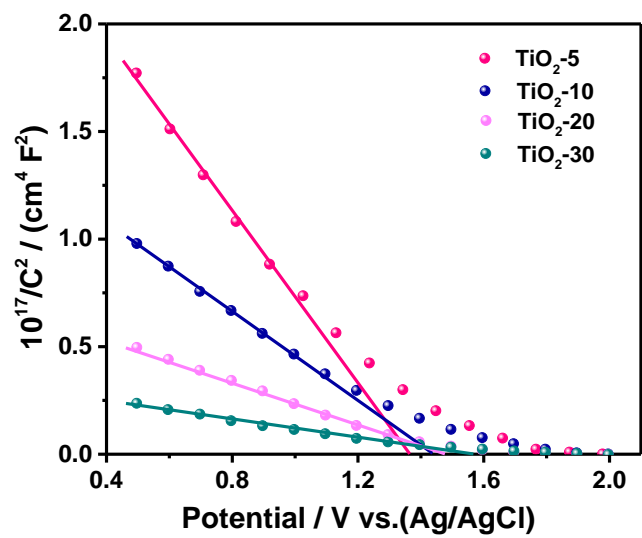

Supplementary Fig. 18 Mott-Schottky plots of TiO<sub>2</sub>-*m* measured in a standard three-electrode cell.

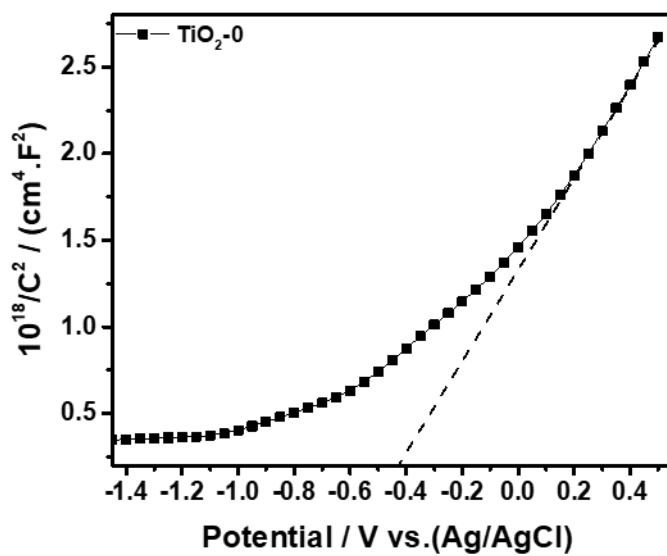

**Supplementary Fig. 19** Mott-Schottky plots of TiO<sub>2</sub>-0 measured in a standard three-electrode cell.

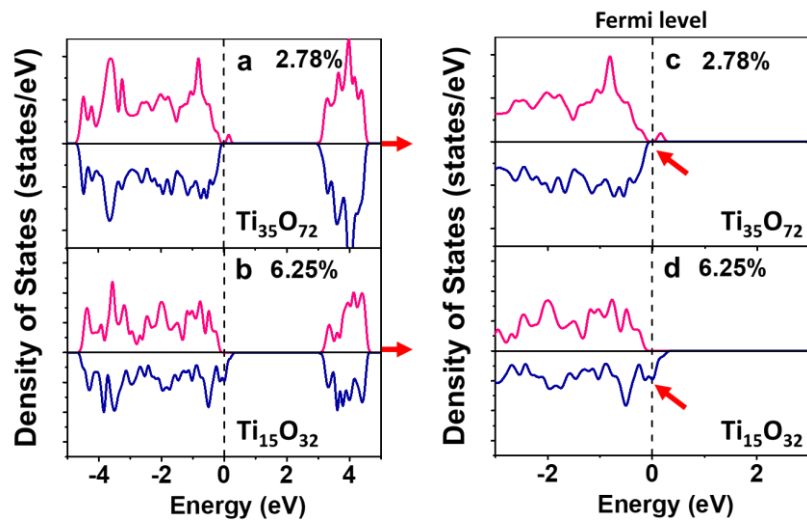

**Supplementary Fig. 20** Calculated total density of states. **a,c**,  $\text{Ti}_{35}\text{O}_{72}$  (2.78%  $\text{V}_{\text{Ti}}$ ) and **b,d**,  $\text{Ti}_{15}\text{O}_{32}$  (6.25%  $\text{V}_{\text{Ti}}$ ).  $\text{Ti}_{35}\text{O}_{72}$  shows much lower spin polarization than  $\text{Ti}_{15}\text{O}_{32}$  at the Fermi level (marked by the arrays).

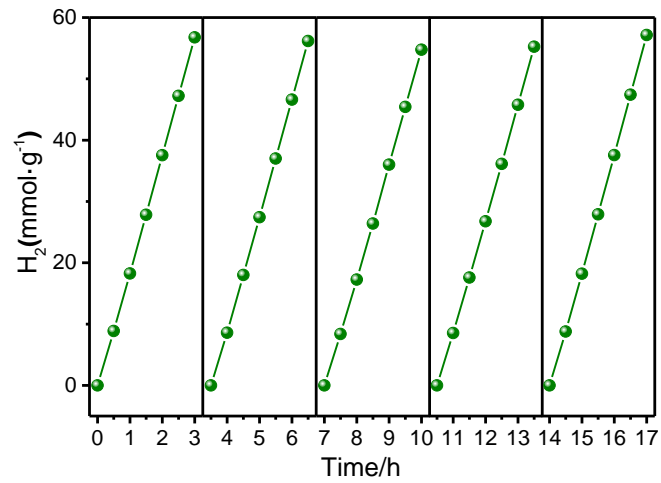

**Supplementary Fig. 21** Stability study of TiO<sub>2</sub>-10 for photocatalytic H<sub>2</sub> generation.

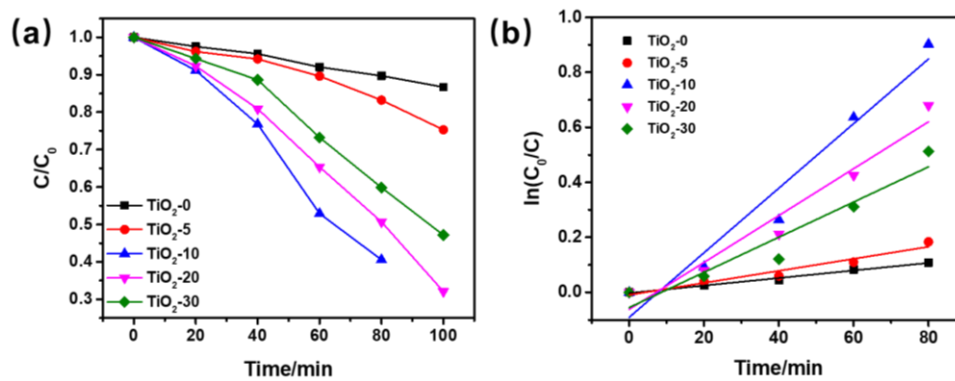

**Supplementary Fig. 22 Photodegradation of phenol using TiO<sub>2</sub>-*m*.** (a) Photodegradation vs. reaction time; (b)  $\ln(C_0/C)$  vs. irradiation time ( $C$  is the corresponding degradative concentration and  $C_0$  is initial concentration of phenol).

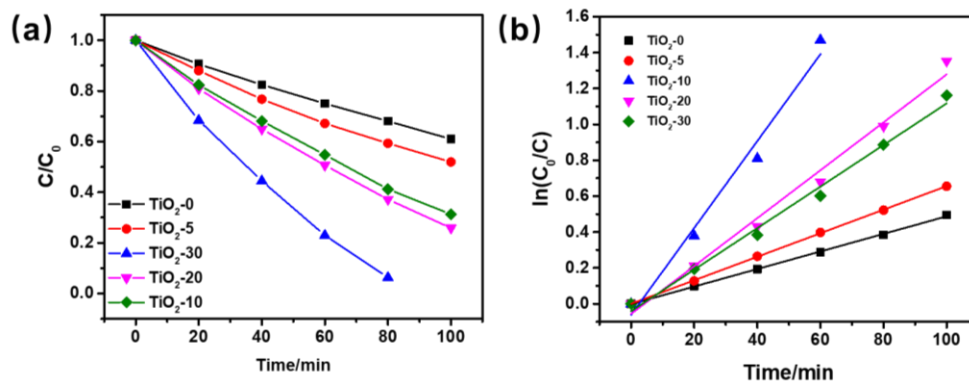

**Supplementary Fig. 23 Photodegradation of MO using TiO<sub>2</sub>-m.** (a) Photodegradation vs. reaction time; (b)  $\ln(C_0/C)$  vs. irradiation time ( $C$  is the corresponding degradative concentration and  $C_0$  is initial concentration of MO).



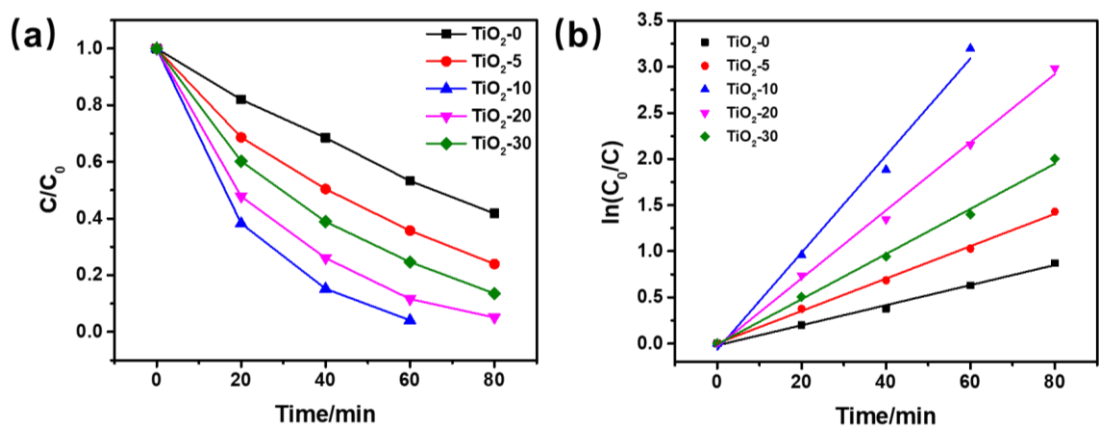

**Supplementary Fig. 24 Photodegradation of RhB using TiO<sub>2</sub>-m.** (a) Photodegradation vs. reaction time; (b)  $\ln(C_0/C)$  vs. irradiation time ( $C$  is the corresponding degradative concentration and  $C_0$  is initial concentration of RhB).

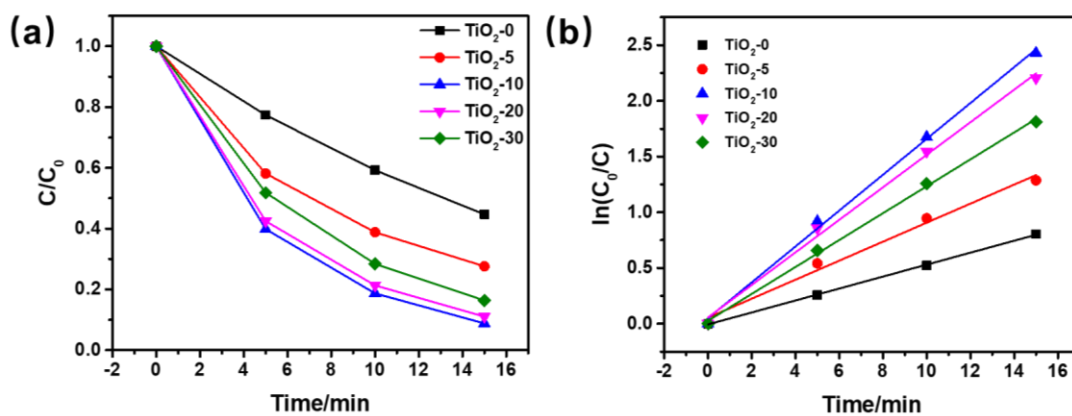

**Supplementary Fig. 25 Photodegradation of Rose Bengal using TiO<sub>2</sub>-*m*.** (a) Photodegradation vs. reaction time; (b)  $\ln(C_0/C)$  vs. irradiation time ( $C$  is the corresponding degradative concentration and  $C_0$  is initial concentration of Rose Bengal).

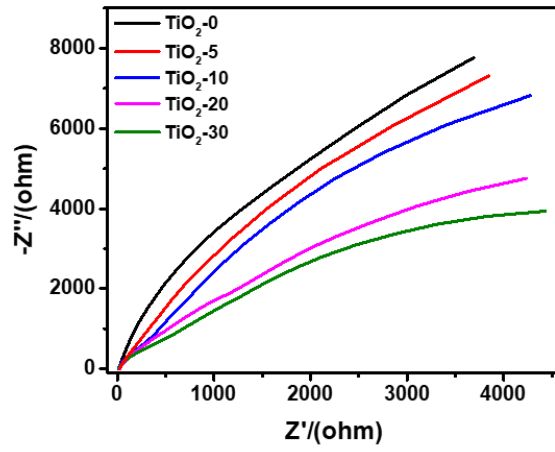

Supplementary Fig. 26 EIS Nyquist plots of  $\text{TiO}_2$ - $m$  under light irradiation.

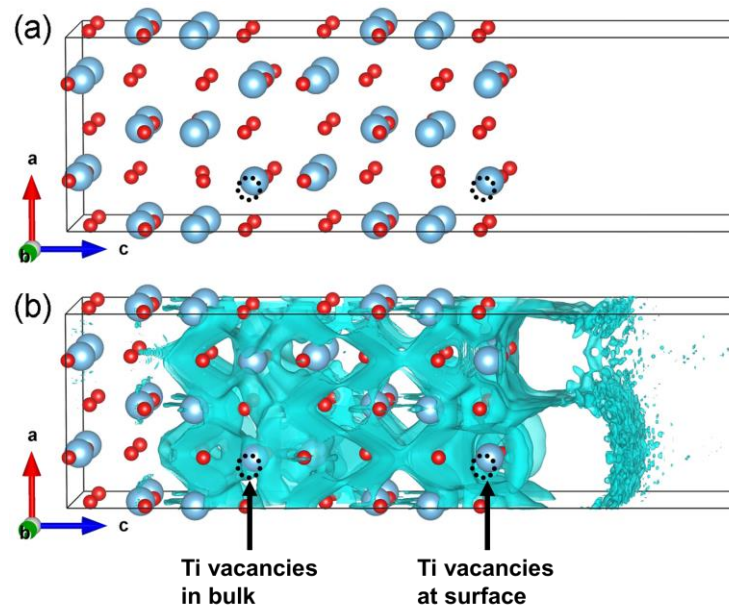

**Supplementary Fig. 27 The calculation of surface and bulk spatial spin polarization (SSP).** (a) The 3D geometry and (b) 3D spatial spin polarization in TiO<sub>2</sub> at  $V_{Ti}=6.25\%$ . The energy interval is  $[E_F - 0.2 \text{ eV}, E_F]$ . The specific iso-surface SSP value is -95%. The dashed black circles indicate the positions of Ti vacancies.

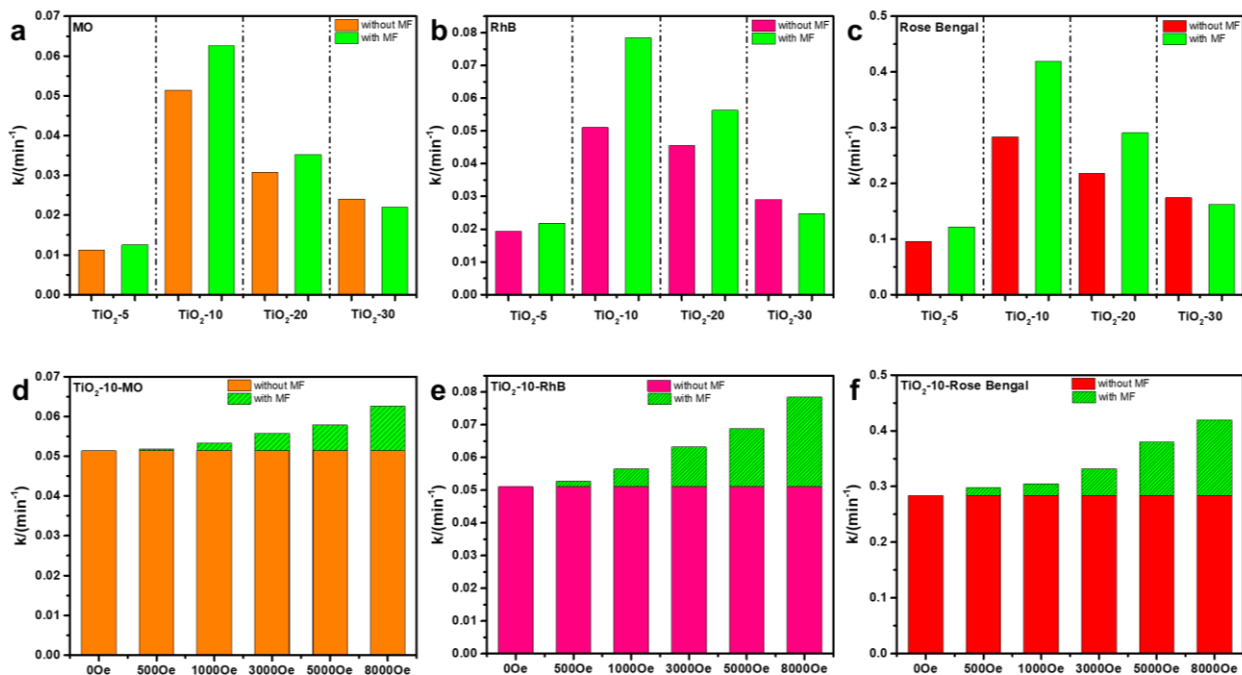

**Supplementary Fig. 28 The effect of magnetic field on photodegradation.** Photodegradation rates of (a) MO, (b) RhB, (c) Rose Bengal without and with magnetic field (8000Oe) of  $\text{TiO}_2$ - $m$ . Photodegradation rates of (d) MO, (e) RhB, (f) Rose Bengal under different magnetic field intensity of  $\text{TiO}_2$ -10.

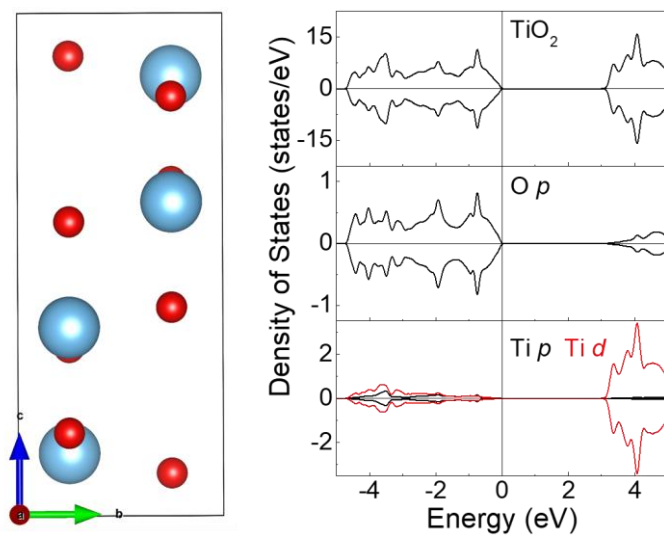

**Supplementary Fig. 29** Calculated supercell and density of states of stoichiometric  $\text{TiO}_2$ .

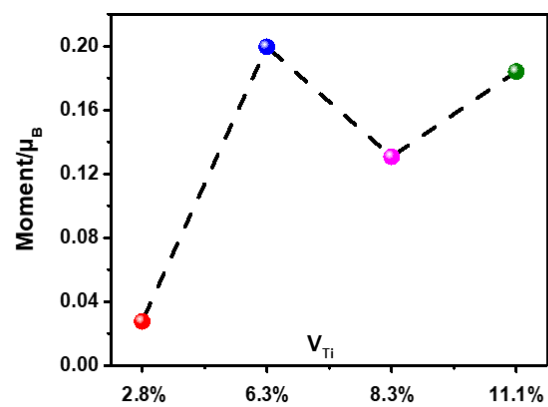

**Supplementary Fig. 30** Calculated moment of defected TiO<sub>2</sub>.

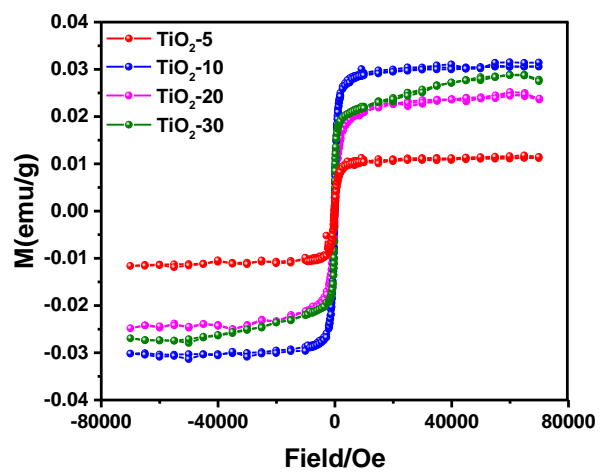

**Supplementary Fig. 31** Magnetization (M-H) curves measured at 300 K of  $\text{TiO}_2$ - $m$ .



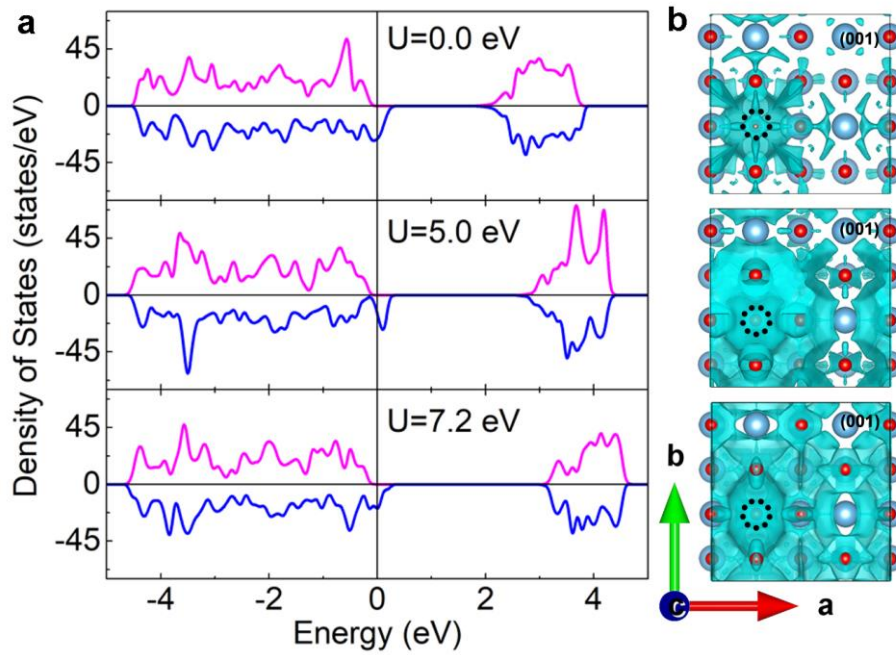

**Supplementary Fig. 32 The effect of Hubbard  $U$  on the spatial spin polarization (SSP).** The DOS (a) and (001)-planar SSP (b) of  $\text{TiO}_2$  at  $V_{\text{Ti}}=6.25\%$  under the Hubbard  $U_{\text{Ti}, 3d}$  of 0.0 eV, 5.0 eV and 7.2 eV, respectively. The Fermi level is indicated by the vertical lines and set to zero. The energy interval is  $[E_F-0.2 \text{ eV}, E_F]$ . The specific iso-surface SSP value is -95%. The dashed black circles indicate the positions of Ti vacancies in  $\text{TiO}_2$ .

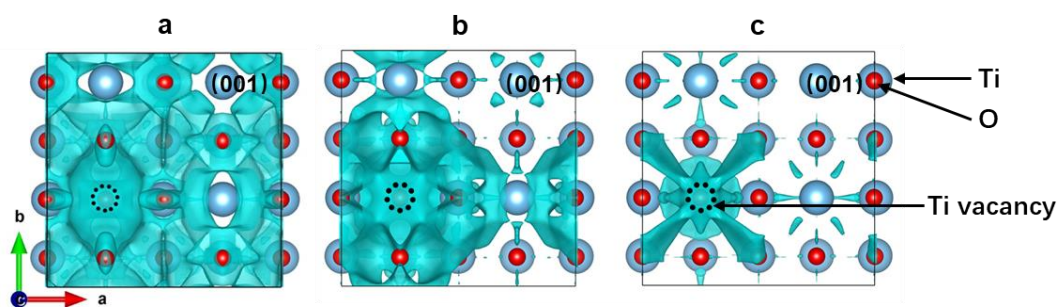

**Supplementary Fig. 33** The effect of energy interval on the spatial spin polarization (SSP). (001)-planar SSP in  $\text{TiO}_2$  at  $V_{\text{Ti}}=6.25\%$  in the energy interval of (a)  $[E_F-0.2 \text{ eV}, E_F]$ , (b)  $[E_F-0.3 \text{ eV}, E_F]$  and (c)  $[E_F-0.4 \text{ eV}, E_F]$ , respectively. The specific iso-surface SSP value is  $-95\%$ .

As shown in **Supplementary Fig. 33**, the energy intervals don't affect the negative SSP results, but affects the spatial distributions of spin polarization. The electrons participating the photocatalysis is around the Fermi level, so we choose the energy range of  $[E_F-0.2 \text{ eV}, E_F]$  for DFT calculation.

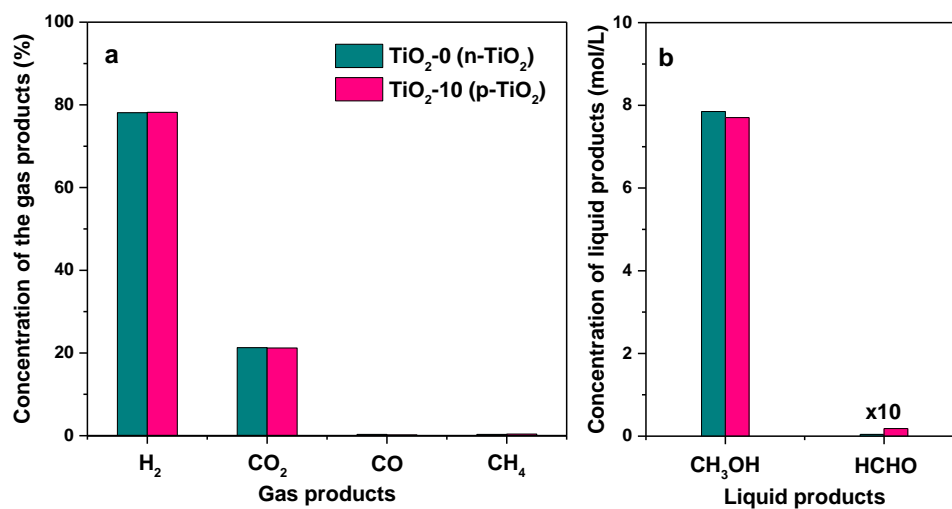

**Supplementary Fig. 34 Products analysis of photocatalysis.** The gas products (a) and liquid products (b) of photocatalytic hydrogen generation and methanol oxidation, detected by gas chromatography and liquid chromatography, respectively. The reaction conditions: 100 mL aqueous solution containing methanol (30 vol%); 10 mg catalysts (TiO<sub>2</sub>-0 or TiO<sub>2</sub>-10); 0.5 °C ± 0.1 °C; reaction time: 8 h. It is worth noting that no formic acid and other byproducts are detected.

## Supplementary Tables

**Supplementary Table 1** Lattice constants and Ti/O molar ratio of TiO<sub>2</sub>-*m*.

| Sample               | <i>a</i> (Å)       | <i>b</i> (Å)       | <i>c</i> (Å)       | Ti/O ratio                               |                    | Defect concentration |                    |
|----------------------|--------------------|--------------------|--------------------|------------------------------------------|--------------------|----------------------|--------------------|
|                      |                    |                    |                    | Bulk                                     | Surface            | bulk                 | surface            |
|                      |                    |                    |                    | 21-1272 <sup>a</sup> (TiO <sub>2</sub> ) | 3.785 <sup>a</sup> | 3.785 <sup>a</sup>   | 9.514 <sup>a</sup> |
| TiO <sub>2</sub> -0  | 3.785 <sup>b</sup> | 3.785 <sup>b</sup> | 9.509 <sup>b</sup> | 0.496 <sup>c</sup>                       | 0.499 <sup>d</sup> | 0.8%                 | 0.2%               |
| TiO <sub>2</sub> -5  | 3.786 <sup>b</sup> | 3.786 <sup>b</sup> | 9.505 <sup>b</sup> | 0.486 <sup>c</sup>                       | 0.485 <sup>d</sup> | 2.8%                 | 3.0%               |
| TiO <sub>2</sub> -10 | 3.787 <sup>b</sup> | 3.787 <sup>b</sup> | 9.503 <sup>b</sup> | 0.468 <sup>c</sup>                       | 0.462 <sup>d</sup> | 6.4%                 | 7.6%               |
| TiO <sub>2</sub> -20 | 3.786 <sup>b</sup> | 3.786 <sup>b</sup> | 9.501 <sup>b</sup> | 0.453 <sup>c</sup>                       | 0.447 <sup>d</sup> | 9.4%                 | 10.6%              |
| TiO <sub>2</sub> -30 | 3.787 <sup>b</sup> | 3.787 <sup>b</sup> | 9.500 <sup>b</sup> | 0.447 <sup>c</sup>                       | 0.445 <sup>d</sup> | 10.6%                | 11.0%              |

<sup>a</sup>Standard JCPDS card of anatase TiO<sub>2</sub>. <sup>b</sup>Fitted from Rietveld refinement of XRD patterns. <sup>c</sup>Calculated from chemical titration.

<sup>d</sup>Calculated from XPS measurement.

**Supplementary Table 2** Parameters of N<sub>2</sub> adsorption-desorption isotherms for TiO<sub>2</sub>-*m*.

| Sample               | Surface area<br>(m <sup>2</sup> /g) | Pore size<br>(nm) | Pore volume<br>(cm <sup>3</sup> /g) |
|----------------------|-------------------------------------|-------------------|-------------------------------------|
| TiO <sub>2</sub> -0  | 64.66                               | 12.14             | 0.2573                              |
| TiO <sub>2</sub> -5  | 81.42                               | 10.78             | 0.2860                              |
| TiO <sub>2</sub> -10 | 104.22                              | 13.02             | 0.4392                              |
| TiO <sub>2</sub> -20 | 85.49                               | 14.71             | 0.4513                              |
| TiO <sub>2</sub> -30 | 91.71                               | 16.93             | 0.5560                              |

**Supplementary Table 3** Positron lifetimes and relative intensities of TiO<sub>2</sub>-*m*.

| Sample               | $\tau_1$ (ps) | $I_1$ (%) | $\tau_2$ (ps) | $I_2$ (%) | $\tau_3$ (ps) | $I_3$ (%) |
|----------------------|---------------|-----------|---------------|-----------|---------------|-----------|
| TiO <sub>2</sub> -0  | 264.0         | 21.5      | 352           | 78.5      | 6100          | NA        |
| TiO <sub>2</sub> -5  | 315.6         | 80.0      | 339.4         | 14.8      | 430.7         | 5.2       |
| TiO <sub>2</sub> -10 | 319.0         | 96.0      | 566           | 3.8       | 2820          | 0.2       |
| TiO <sub>2</sub> -20 | 321.5         | 90.3      | 374.8         | 9.4       | 554.1         | 0.3       |
| TiO <sub>2</sub> -30 | 314.8         | 87.5      | 446.6         | 11.7      | 2427          | 0.8       |

**Supplementary Table 4** Fitted parameters of Ti K-edge EXAFS curves for TiO<sub>2</sub>-*m*.

| Sample               | path               | $R(\text{\AA})^a$ | $S_0^2{}^b$ | $N^c$ | $S^2(\text{\AA}^{-2})^d$ | $R_{\text{eff}}(\text{\AA})^e$ |
|----------------------|--------------------|-------------------|-------------|-------|--------------------------|--------------------------------|
| TiO <sub>2</sub> -0  | Ti-O <sub>1</sub>  | 1.94487           |             | 4     | 0.00538                  | 1.93230                        |
|                      | Ti-O <sub>2</sub>  | 1.99137           | 0.8         | 2     | 0.00538                  | 1.97880                        |
|                      | Ti-Ti <sub>1</sub> | 2.99700           |             | 4     | 0.00611                  | 3.03640                        |
| TiO <sub>2</sub> -5  | Ti-O <sub>1</sub>  | 1.94489           |             | 4     | 0.00544                  | 1.93230                        |
|                      | Ti-O <sub>2</sub>  | 1.99139           | 0.8         | 2     | 0.00544                  | 1.97880                        |
|                      | Ti-Ti <sub>1</sub> | 2.99169           |             | 3.87  | 0.00640                  | 3.03640                        |
| TiO <sub>2</sub> -10 | Ti-O <sub>1</sub>  | 1.94675           |             | 4     | 0.00577                  | 1.93230                        |
|                      | Ti-O <sub>2</sub>  | 1.99325           | 0.8         | 2     | 0.00577                  | 1.97880                        |
|                      | Ti-Ti <sub>1</sub> | 2.99572           |             | 3.82  | 0.00690                  | 3.03640                        |
| TiO <sub>2</sub> -20 | Ti-O <sub>1</sub>  | 1.94948           |             | 4     | 0.00590                  | 1.93230                        |
|                      | Ti-O <sub>2</sub>  | 1.99598           | 0.8         | 2     | 0.00590                  | 1.97880                        |
|                      | Ti-Ti <sub>1</sub> | 2.99545           |             | 3.79  | 0.00660                  | 3.03640                        |
| TiO <sub>2</sub> -30 | Ti-O <sub>1</sub>  | 1.95025           |             | 4     | 0.00599                  | 1.93230                        |
|                      | Ti-O <sub>2</sub>  | 1.99676           | 0.8         | 2     | 0.00599                  | 1.97880                        |
|                      | Ti-Ti <sub>1</sub> | 2.99506           |             | 3.75  | 0.00650                  | 3.03640                        |

<sup>a</sup>Actual distance to neighboring atom. <sup>b</sup>Amplitude attenuation factor. <sup>c</sup>Coordination number of neighboring atom. <sup>d</sup>Mean-square disorder of neighbor distance. <sup>e</sup>Theoretical distance to neighboring atom.

**Supplementary Table 5** Parameters of Mott-Schottky plots for TiO<sub>2</sub>-*m*.

| Sample               | Carrier type | Flat band potential<br>(V vs. Ag/AgCl) | Carrier density<br>(cm <sup>-3</sup> ) |
|----------------------|--------------|----------------------------------------|----------------------------------------|
| TiO <sub>2</sub> -0  | n            | -0.42                                  | 8.79×10 <sup>11</sup>                  |
| TiO <sub>2</sub> -5  | p            | 1.41                                   | 1.37×10 <sup>13</sup>                  |
| TiO <sub>2</sub> -10 | p            | 1.45                                   | 2.51×10 <sup>13</sup>                  |
| TiO <sub>2</sub> -20 | p            | 1.49                                   | 5.16×10 <sup>13</sup>                  |
| TiO <sub>2</sub> -30 | p            | 1.55                                   | 1.23×10 <sup>14</sup>                  |

The density of carriers is calculated by means of Mott-Schottky formula

$$N_d = \frac{2}{\varepsilon\varepsilon_0 e} \frac{d(E-E_{fb}-\frac{kT}{e})}{d(\frac{1}{C^2})} \quad (2)$$

where  $N_d$  is charge carrier densities,  $\varepsilon_0$  is vacuum permittivity ( $8.854 \times 10^{-14}$  F/cm),  $\varepsilon$  is permittivity of anatase TiO<sub>2</sub>,  $e$  equals to  $1.6 \times 10^{-19}$  C and  $d(E-E_{fb}-kT/e)/d(1/C^2)$  is the reciprocal of the slope of the Mott-Schottky curves.



**Supplementary Table 6** Average fluorescent lifetime of TiO<sub>2</sub>-*m*.

| Sample               | $A_1(\%)$ | $\tau_1(\text{ns})$ | $A_2(\%)$ | $\tau_2(\text{ns})$ | $\tau_a(\text{ns})$ |
|----------------------|-----------|---------------------|-----------|---------------------|---------------------|
| TiO <sub>2</sub> -0  | 21.63     | 0.323               | 78.37     | 4.10                | 4.02                |
| TiO <sub>2</sub> -5  | 20.19     | 0.476               | 79.81     | 4.33                | 4.23                |
| TiO <sub>2</sub> -10 | 10.38     | 0.332               | 89.62     | 4.78                | 4.74                |
| TiO <sub>2</sub> -20 | 16.16     | 0.336               | 83.84     | 4.62                | 4.56                |
| TiO <sub>2</sub> -30 | 17.11     | 0.335               | 82.98     | 4.55                | 4.48                |

All the PL decays are fitted <sup>4</sup>:

$$I(t) = A_1 e^{-t/\tau_1} + A_2 e^{-t/\tau_2} \quad (3)$$

where  $\tau_1$  and  $\tau_2$  are the fluorescent lifetime, and  $A_1$  and  $A_2$  are the corresponding amplitude.

Supplementary Table 6 summarizes the average fluorescent lifetime, given by

$$\tau_a = \frac{A_1 \tau_1^2 + A_2 \tau_2^2}{A_1 \tau_1 + A_2 \tau_2} \quad (4)$$

**Supplementary Table 7** The supercell size and atomic numbers of normal and Ti-defected TiO<sub>2</sub>.

| $V_{\text{Ti}}^a$ | $a(\text{\AA})$ | $b(\text{\AA})$ | $c(\text{\AA})$ | atom                             |
|-------------------|-----------------|-----------------|-----------------|----------------------------------|
| 0.0%              | 3.916           | 3.916           | 9.606           | Ti <sub>4</sub> O <sub>8</sub>   |
| 6.25%             | 7.865           | 7.865           | 9.497           | Ti <sub>15</sub> O <sub>32</sub> |

<sup>a</sup>  $V_{\text{Ti}}$  indicates the content of Ti vacancies in TiO<sub>2</sub>.

## Supplementary Methods

**Quantum efficiency test and calculation.** The apparent quantum efficiency at 380 nm was measured using the same experimental setup with that for photocatalysis. 10 mg catalyst were dispersed in 100 mL aqueous solution containing methanol (30 vol%). 0.5 wt% Pt was introduced as cocatalyst by *in-situ* photodeposition. The temperature of reaction solution was maintained at  $0.5\text{ }^{\circ}\text{C} \pm 0.1\text{ }^{\circ}\text{C}$ . The photocatalyst aqueous solution was irradiated by a 300 W Xe lamp with a 380 nm band-pass optical filter with full width at half maximum of 15 nm. The average intensity of irradiation was determined to be  $2.0\text{ mW/cm}^2$  by a UV-A radiometer (Photoelectric Instrument Factory, Beijing Normal University) and the irradiation area was  $20\text{ cm}^2$ . The amount of  $\text{H}_2$  molecules generated in 2 h was used for quantum efficiency evaluation on the basis of the following formula:

$$\text{AQE} = \frac{2 \times \text{the number of evolved H}_2 \text{ molecules}}{\text{the number of incident photons}} \times 100\% \quad (5)$$

where AQE is the apparent quantum efficiency.

**Gaseous products and liquid products analysis of the photocatalytic reaction.** The reaction was carried out under ultraviolet light in a reaction device similar to that for photocatalysis but with two sampling ports (gas phase and liquid phase). 10 mg catalyst were dispersed in 100 mL aqueous solution containing methanol (30 vol%). 1 wt% Pt was introduced as cocatalyst by *in-situ* photodeposition. The temperature of reaction solution was maintained at  $0.5\text{ }^{\circ}\text{C} \pm 0.1\text{ }^{\circ}\text{C}$ . The analysis of the gaseous reaction mixtures at 8 h was carried out using a gas chromatograph (Shimadzu GC-2010Plus) equipped with a barrier discharge ionization detector (BID) and column (C47839-06). Liquid products were quantitatively analyzed by a high performance liquid chromatography (HPLC) (Agilent 1260 Infinity LC) with a DAD detector and C18 column (ZORBAX Eclipse XDB-C18).

## Supplementary References

1. Hu, C., et al. Edge sites with unsaturated coordination on core-shell  $\text{Mn}_3\text{O}_4@\text{Mn}_x\text{Co}_{3-x}\text{O}_4$  nanostructures for electrocatalytic water oxidation. *Adv. Mater.* **29**, 1701820 (2017).
2. Li, X., et al. Structures and magnetic properties of p-type Mn:TiO<sub>2</sub> dilute magnetic semiconductor thin films. *J. Appl. Phys.* **106**, 043913 (2009).
3. Zhang, H., et al. Novel TiO<sub>2</sub>/PEGDA hybrid hydrogel prepared *in-situ* on tumor cells for effective photodynamic therapy. *ACS Appl. Mater. Interfaces* **5**, 12317-12322 (2013).
4. Shepherd, D.P., Sambur, J.B., Liang, Y.-Q., Parkinson, B.A. & Van Orden, A. *In-situ* studies of photoluminescence quenching and photocurrent yield in quantum dot sensitized single crystal TiO<sub>2</sub> and ZnO electrodes. *J. Phys. Chem. C* **116**, 21069-21076 (2012).
